# Supplementary material for: Engineering xylose metabolism in triacylglycerol-producing Rhodococcus opacus for lignocellulosic fuel production
Source: PubMed Central journal article supplement (PMC3848844; doi:10.1186/1754-6834-6-134), 2013-09-16
Supplement: 1754-6834-6-134-S1.pdf [file 1754-6834-6-134-S1.pdf]

**Table S1 Growth and TAG production as fatty acids of *R. opacus* transformants on xylose**

| Strain | Growth            |                        | Fatty acid production |                              |
|--------|-------------------|------------------------|-----------------------|------------------------------|
|        | OD <sub>660</sub> | CDW, g l <sup>-1</sup> | % CDW                 | g l <sup>-1</sup> of culture |
| Xsp1   | 10.0 ± 1.8        | 3.7 ± 0.9              | 32.7 ± 0.6            | 1.2 ± 0.3                    |
| Xsp8   | 13.6 ± 1.1        | 5.3 ± 0.5              | 39.0 ± 7.8            | 2.1 ± 0.5                    |
| Xsp10  | 10.5 ± 0.8        | 4.3 ± 0.2              | 30.7 ± 3.1            | 1.2 ± 0.2                    |
| Xsp12  | 12.7 ± 1.1        | 4.9 ± 0.5              | 32.0 ± 3.6            | 1.6 ± 0.3                    |
| Xsp23  | 10.2 ± 1.6        | 5.1 ± 1.2              | 9.3 ± 1.5             | 0.5 ± 0.1                    |
| Xsp26  | 11.3 ± 1.2        | 5.0 ± 0.5              | 8.7 ± 1.5             | 0.4 ± 0.1                    |
| Xsp33  | 12.8 ± 4.9        | 6.5 ± 4.5              | 10.0 ± 2.0            | 0.6 ± 0.3                    |
| Xsp37  | 12.0 ± 3.1        | 6.3 ± 1.4              | 10.3 ± 1.5            | 0.7 ± 0.1                    |

The strains were grown in modified defined medium containing 40 g l<sup>-1</sup> xylose and 1.4 g l<sup>-1</sup> (NH<sub>4</sub>)<sub>2</sub>SO<sub>4</sub> supplemented with gentamicin in flask cultures for 6 days. Initial inoculum densities were adjusted to obtain an OD<sub>660</sub> of 0.3. Data represent the results of triplicate experiments, ±s.d.

**Table S2 Strains and plasmids used in this study**

| Strain or plasmid           | Description                                                                                                                                                                                                                               | Reference         |
|-----------------------------|-------------------------------------------------------------------------------------------------------------------------------------------------------------------------------------------------------------------------------------------|-------------------|
| <b>Strains</b>              |                                                                                                                                                                                                                                           |                   |
| <i>Rhodococcus opacus</i>   |                                                                                                                                                                                                                                           |                   |
| PD630                       | Wild type                                                                                                                                                                                                                                 | [ <sup>20</sup> ] |
| Xsp1                        | Gm <sup>R</sup> ; obtained by transformation of pAL358 carrying DNA fragments from <i>S. padanus</i> into PD630                                                                                                                           | This study        |
| Xsp8                        | Gm <sup>R</sup> ; obtained by transformation of pAL358 carrying DNA fragments from <i>S. padanus</i> into PD630                                                                                                                           | This study        |
| Xsp10                       | Gm <sup>R</sup> ; obtained by transformation of pAL358 carrying DNA fragments from <i>S. padanus</i> into PD630                                                                                                                           | This study        |
| Xsp12                       | Gm <sup>R</sup> ; obtained by transformation of pAL358 carrying DNA fragments from <i>S. padanus</i> into PD630                                                                                                                           | This study        |
| Xsp23                       | Gm <sup>R</sup> ; obtained by transformation of pAL358 carrying DNA fragments from <i>S. padanus</i> into PD630                                                                                                                           | This study        |
| Xsp26                       | Gm <sup>R</sup> ; obtained by transformation of pAL358 carrying DNA fragments from <i>S. padanus</i> into PD630                                                                                                                           | This study        |
| Xsp33                       | Gm <sup>R</sup> ; obtained by transformation of pAL358 carrying DNA fragments from <i>S. padanus</i> into PD630                                                                                                                           | This study        |
| Xsp37                       | Gm <sup>R</sup> ; obtained by transformation of pAL358 carrying DNA fragments from <i>S. padanus</i> into PD630                                                                                                                           | This study        |
| Xsp8C                       | Spontaneous plasmid (pXsp8)-cured strain of Xsp8                                                                                                                                                                                          | This study        |
| Xsp8X0-1 to -6              | Spec <sup>R</sup> ; obtained by transformation of pX0 into Xsp8C                                                                                                                                                                          | This study        |
| Xsp8X1-1 to -6              | Spec <sup>R</sup> ; obtained by transformation of pX1 into Xsp8C                                                                                                                                                                          | This study        |
| Xsp8X2-1 to -6              | Spec <sup>R</sup> ; obtained by transformation of pX2 into Xsp8C                                                                                                                                                                          | This study        |
| Xsp8X3-1 to -6              | Spec <sup>R</sup> ; obtained by transformation of pX3 into Xsp8C                                                                                                                                                                          | This study        |
| Xsp8X4-1 to -6              | Spec <sup>R</sup> ; obtained by transformation of pX4 into Xsp8C                                                                                                                                                                          | This study        |
| PD630X0-1 to -6             | Spec <sup>R</sup> ; obtained by transformation of pX0 into PD630                                                                                                                                                                          | This study        |
| PD630X1-1 to -6             | Spec <sup>R</sup> ; obtained by transformation of pX1 into PD630                                                                                                                                                                          | This study        |
| PD630X2-1 to -6             | Spec <sup>R</sup> ; obtained by transformation of pX2 into PD630                                                                                                                                                                          | This study        |
| PD630X3-1 to -6             | Spec <sup>R</sup> ; obtained by transformation of pX3 into PD630                                                                                                                                                                          | This study        |
| PD630X4-1 to -6             | Spec <sup>R</sup> ; obtained by transformation of pX4 into PD630                                                                                                                                                                          | This study        |
| <i>Streptomyces padanus</i> |                                                                                                                                                                                                                                           |                   |
| MITKK-103                   | Wild type                                                                                                                                                                                                                                 | [ <sup>28</sup> ] |
| <i>Escherichia coli</i>     |                                                                                                                                                                                                                                           |                   |
| TOP10                       | F <sup>-</sup> <i>mcrA</i> Δ( <i>mrr-hsdRMS-mcrBC</i> ) φ80 <i>lacZ</i> Δ <i>M15</i> Δ <i>lacX74</i> <i>recA1</i> <i>araD139</i> Δ( <i>ara-leu</i> )7697 <i>galU</i> <i>galK</i> <i>rpsL</i> (Str <sup>R</sup> ) <i>endA1</i> <i>nupG</i> | Invitrogen        |
| <b>Plasmids</b>             |                                                                                                                                                                                                                                           |                   |
| pCR-Blunt II-TOPO           | TOPO cloning vector for bacterial expression, Km <sup>R</sup>                                                                                                                                                                             | Invitrogen        |
| pAL358                      | <i>Rhodococcus/E. coli</i> shuttle vector, Gm <sup>R</sup>                                                                                                                                                                                | [ <sup>48</sup> ] |
| pXsp8                       | pAL358 derivative with 3603-bp <i>Bam</i> HI insert containing <i>xyIA</i> and <i>xyIB</i> from <i>S. padanus</i>                                                                                                                         | This study        |
| pAL307                      | <i>Rhodococcus/E. coli</i> shuttle vector, Spc <sup>R</sup>                                                                                                                                                                               | [ <sup>47</sup> ] |
| pX0                         | pAL307 derivative carrying 125-bp <i>Bam</i> HI- <i>SpeI</i> insert without <i>xyIA</i> and/or <i>xyIB</i> from pXsp8                                                                                                                     | This study        |
| pX1                         | pAL307 derivative with 1475-bp <i>Bam</i> HI- <i>SpeI</i> insert containing <i>xyIA</i> from pXsp8                                                                                                                                        | This study        |
| pX2                         | pAL307 derivative with 2064-bp <i>Bam</i> HI- <i>SpeI</i> insert containing <i>xyIB</i> from pXsp8                                                                                                                                        | This study        |
| pX3                         | pAL307 derivative with 3537-bp <i>Bam</i> HI- <i>SpeI</i> insert containing <i>xyIA</i> and <i>xyIB</i> from pXsp8                                                                                                                        | This study        |
| pX4                         | pAL307 derivative with 2826-bp <i>Bam</i> HI- <i>SpeI</i> insert containing <i>xyIA</i> and <i>xyIB</i> without cellulose-binding domain from pXsp8                                                                                       | This study        |

Str<sup>R</sup>, streptomycin resistance; Gm<sup>R</sup>, gentamicin resistance; Spec<sup>R</sup>, spectinomycin resistance; Km<sup>R</sup>, kanamycin resistance.

**Table S3 Primers used in this study**

| Primer                | Sequence (5'-3')                                    | Purpose                                  |
|-----------------------|-----------------------------------------------------|------------------------------------------|
| 3603- <i>xyIA</i> -U  | <u>GGATCC</u> GTGGAAGACATCTGTGCGA                   | Construction of pX0, pX1, pX3 and pX4    |
| 3603- <i>xyIA</i> -D1 | <u>GGACTAGT</u> GGAGCATGGCGAGGTGACGCA               | Construction of pX1                      |
| 3603- <i>xyIA</i> -D2 | <u>CTGCAGG</u> AGCATGGCGAGGTGACGCA                  | Construction of pX3 and pX4              |
| 3603- <i>xyIB</i> -U1 | <u>GGATCC</u> GGTGTCTTCGACCACAAGGT                  | Construction of pX2                      |
| 3603- <i>xyIB</i> -D  | <u>GGACTAGT</u> GGAACCCTATCGGGTCTGCT                | Construction of pX2 and pX3              |
| 3603- <i>xyIB</i> -U2 | <u>CTGCAGT</u> TTTCAGCTGGCACGACAGGT                 | Construction of pX3 and pX4              |
| 3603- <i>xyIB#</i> -D | <u>GGACTAGT</u> <b>CTACT</b> GGACCGCCGTCCGGACAGCCGT | Construction of pX4                      |
| 3603- <i>dele</i> -D  | <u>GGACTAGT</u> GGCTCCTTGTTCCGTACGA                 | Construction of pX0                      |
| pAL358-M13R0          | GCACCTGTCCTACGAGTTGCA                               | Sequencing of pXsp8                      |
| pAL358-M13F0          | CCTCTAGATGCATGCTCGA                                 | Sequencing of pXsp8                      |
| pXsp8-F2              | GCATCGACATCGAAGTCCTCGA                              | Sequencing of pXsp8                      |
| pXsp8-F3              | GGTCGATGTGGAAGAGCT                                  | Sequencing of pXsp8                      |
| pXsp8-F4              | CGAAGGTGAACCTGTCCT                                  | Sequencing of pXsp8                      |
| pXsp8-F5              | CCTTTCTCCAAGGGCACGT                                 | Sequencing of pXsp8                      |
| pXsp8-F6              | CCAGCAGGTGCGTAACGA                                  | Sequencing of pXsp8                      |
| pXsp8-F7              | GCTTTGTCCCGTTCTAGCGT                                | Sequencing of pXsp8                      |
| pAL358-1164f          | GCAACTGGTCCAGAACCT                                  | Sequencing of pXsp8                      |
| pAL358-1754f          | CGTGCAAGCAGATTACGGT                                 | Sequencing of pXsp8                      |
| pAL358-2351f          | CCACCAGCTATCCTTCTTGCA                               | Sequencing of pXsp8                      |
| pAL358-3037f          | CCTGGTCGTAGACGTTGACCA                               | Sequencing of pXsp8                      |
| pAL358-3602f          | CGTGTGCTCTGGATTGTCCA                                | Sequencing of pXsp8                      |
| pAL358-4320f          | CCTCTGTTCTCCTAGACCT                                 | Sequencing of pXsp8                      |
| pAL307-411f           | GCTTGGCCAGGTTTCGTCTCGA                              | Sequencing of pX2 and pX3                |
| pAL307-638r           | CCCAGCAGGTGCGTAACGA                                 | Sequencing of pX3                        |
| pAL307-1062f          | GCGTGCAGTTCAGGGTGCA                                 | Sequencing of pX2, pX3 and pX4           |
| pAL307-1649f          | CGGACATCGTTCCAGAGCA                                 | Sequencing of pX2, pX3 and pX4           |
| pAL307-2099f          | GGTCATGACGTCAGCATAGGA                               | Sequencing of pX3 and pX4                |
| pAL307-2680f          | CCGTTGAGGTGCGATGTGGA                                | Sequencing of pX1, pX3 and pX4           |
| pAL307-2953r          | GCATGAAGGAGGCGTTTCGACCT                             | Sequencing of pX1, pX3 and pX4           |
| pAL307-3137f          | GGGTGAAGAGGTTTCGTGGT                                | Sequencing of pX1, pX3 and pX4           |
| pAL307-3745f          | GCACAGCCATACCACAGCT                                 | Sequencing of pX0, pX1, pX2, pX3 and pX4 |
| pAL307-4376f          | GCTGGCTCGAAGATACCTGCA                               | Sequencing of pX0, pX1, pX2, pX3 and pX4 |
| pAL307-4897f          | GCGTCACCTTCATGGTGGT                                 | Sequencing of pX0, pX1, pX2, pX3 and pX4 |
| pAL307-5572f          | GGGTTCGTGTAGACTTTCCT                                | Sequencing of pX0, pX1, pX2, pX3 and pX4 |
| pAL307-6359f          | CCACGGTTCAGTCACACGA                                 | Sequencing of pX0, pX1, pX2, pX3 and pX4 |
| pAL307-7073f          | GCTCTGGATTGTCCAAGGA                                 | Sequencing of pX0, pX1, pX2, pX3 and pX4 |
| pAL307-7672f          | GGGTCTCATACCGTAAGCA                                 | Sequencing of pX0, pX1, pX2, pX3 and pX4 |

The restriction sites introduced into primers are underlined, and the stop codon is highlighted in bold.
